# Supplementary material for: The Association of Arsenic Metabolism and Blood Pressure: A Cross-Sectional Analysis in the MesoAmerican Nephropathy Occupational Study (MANOS)
Source: Research Square preprint supplement (doi:10.21203/rs.3.rs-9107335/v1), 2026-03-24
Supplement: Supplementary file 1 [file dde90a4216accf64a9edf701.docx]

| **Supplementary Table 1.** Descriptive statistics of MANOS cohort by arsenic exposure levels and metrics of arsenic metabolism. | | | | | | | | | |
| --- | --- | --- | --- | --- | --- | --- | --- | --- | --- |
| **Covariate** | | **Urinary Arsenic Concentration, ug/L** | | | |  | **Proportion of Each Arsenic Metabolite, %** | | |
| **InAs** | **MMA** | **DMA** | **Summed Urinary Arsenic** |  | **InAs** | **MMA** | **DMA** |
| **Age** | | | | | | | | | |
|  | 18-25 years old | 1.26 (1.32) | 1.58 (1.53) | 8.43 (8.18) | 11.7 (11.3) |  | 11.5 (5.55) | 14.5 (4.10) | 73.3 (9.99) |
|  | 25-32 years old | 1.09 (1.24) | 1.39 (1.19) | 7.79 (6.89) | 10.6 (8.85) |  | 11.3 (5.92) | 15.2 (6.25) | 74.0 (10.3) |
|  | 32-45 years old | 0.98 (1.40) | 1.49 (1.44) | 8.18 (9.34) | 10.7 (12.4) |  | 9.68 (6.66) | 15.4 (5.88) | 75.4 (10.6) |
| **BMI** | | | | | | | | | |
|  | Underweight | 0.95 (2.13) | 1.49 (1.95) | 5.91 (6.01) | 8.17 (10.7) |  | 15.3 (3.93) | 18.7 (1.75) | 65.9 (9.78) |
|  | Healthy Weight | 1.13 (1.29) | 1.42 (1.43) | 7.34 (7.00) | 10.3 (9.14) |  | 11.5 (5.48) | 15.4 (5.07) | 72.7 (9.29) |
|  | Overweight | 1.06 (1.40) | 1.46 (1.46) | 8.58 (8.70) | 11.0 (11.4) |  | 9.97 (6.64) | 14.1 (4.40) | 75.5 (8.54) |
|  | Obese | 1.42 (1.24) | 1.71 (0.86) | 13.1 (12.0) | 17.5 (12.1) |  | 9.56 (5.90) | 11.0 (5.66) | 79.4 (12.0) |
| **Use Pesticides at Work** | | | | | | | | | |
|  | Yes | 0.79 (0.84) | 1.07 (1.00) | 5.50 (5.79) | 7.65 (8.38) |  | 10.8 (6.04) | 13.1 (5.38) | 75.9 (9.22) |
|  | No | 1.23 (1.38) | 1.62 (1.44) | 8.48 (8.70) | 11.7 (11.9) |  | 11.3 (6.42) | 15.2 (5.35) | 73.5 (10.1) |
| **Water Consumption at Work** | | | | | | | | | |
|  | 0-3 liters | 1.17 (1.33) | 1.55 (1.46) | 7.51 (7.76) | 10.7 (10.7) |  | 11.5 (5.96) | 15.2 (5.63) | 73.4 (10.1) |
|  | 3-3.96 liters | 1.16 (1.19) | 1.54 (1.04) | 8.34 (6.37) | 11.7 (9.81) |  | 10.9 (7.26) | 13.9 (6.24) | 74.2 (12.5) |
|  | 3.96-18.9 liters | 1.01 (1.64) | 1.37 (1.60) | 8.04 (8.72) | 10.8 (11.6) |  | 11.1 (5.37) | 14.9 (5.05) | 74.5 (7.77) |
| **Worksite** | | | | | | | | | |
|  | Sugar 1 | 1.61 (1.44) | 2.03 (1.91) | 10.3 (10.6) | 14.5 (13.1) |  | 11.6 (5.61) | 15.7 (5.39) | 73.2 (6.57) |
|  | Sugar 2 | 1.62 (2.01) | 2.42 (1.94) | 12.9 (14.7) | 17.2 (19.9) |  | 9.36 (7.05) | 14.4 (6.08) | 75.5 (11.0) |
|  | Sugar 3 | 1.00 (1.02) | 1.14 (0.79) | 7.80 (5.63) | 9.82 (8.34) |  | 10.3 (6.45) | 11.5 (4.04) | 78.3 (7.36) |
|  | Sugar 4 | 0.56 (0.73) | 0.75 (0.87) | 4.11 (6.58) | 5.66 (8.02) |  | 11.0 (4.50) | 15.2 (4.75) | 74.9 (9.15) |
|  | Construction | 1.11 (1.10) | 1.46 (0.84) | 7.95 (7.06) | 10.4 (9.13) |  | 11.2 (6.63) | 14.9 (4.34) | 74.3 (11.3) |
|  | Brick Making | 1.67 (1.74) | 1.83 (1.85) | 9.29 (9.54) | 12.9 (12.8) |  | 12.4 (6.25) | 15.5 (4.60) | 72.3 (9.05) |
|  | Corn | 0.89 (1.09) | 1.34 (1.04) | 6.33 (5.53) | 8.38 (7.60) |  | 11.2 (7.10) | 14.8 (5.61) | 74.9 (11.1) |
|  | Plantain 1 | 1.18 (0.94) | 1.81 (1.15) | 9.51 (7.43) | 12.7 (8.34) |  | 8.85 (5.00) | 13.1 (6.27) | 77.3 (10.7) |
|  | Plantain 2 | 1.15 (1.19) | 1.83 (1.46) | 8.98 (6.77) | 11.5 (11.1) |  | 11.3 (3.59) | 14.7 (4.99) | 73.8 (7.21) |
| **Systolic Blood Pressure** | | | | | | | | | |
|  | <120 mmHg | 1.11 (1.25) | 1.48 (1.38) | 7.11 (6.53) | 9.78 (9.20) |  | 11.5 (6.45) | 16.0 (4.92) | 72.1 (9.09) |
|  | ≥120 mmHg | 1.14 (1.38) | 1.50 (1.38) | 8.48 (8.89) | 11.1 (12.3) |  | 11.0 (6.03) | 14.4 (5.20) | 74.9 (10.2) |
| **Diastolic Blood Pressure** | | | | | | | | | |
|  | <80 mmHg | 1.08 (1.28) | 1.39 (1.26) | 7.22 (7.01) | 10.3 (8.90) |  | 11.5 (6.18) | 15.2 (5.77) | 73.3 (10.8) |
|  | ≥80 mmHg | 1.27 (1.55) | 1.70 (1.58) | 10.1 (10.4) | 13.8 (13.5) |  | 10.6 (6.68) | 14.5 (4.38) | 75.4 (8.19) |
| **Pulse Pressure** | | | | | | | | | |
|  | <64 mmHg | 1.16 (1.36) | 1.51 (1.46) | 8.08 (7.87) | 11.1 (11.0) |  | 11.3 (6.32) | 15.2 (5.61) | 73.8 (10.1) |
|  | ≥64mmHg | 1.03 (1.26) | 1.29 (1.11) | 6.89 (6.05) | 9.26 (7.92) |  | 10.2 (5.90) | 13.3 (3.65) | 76.3 (9.34) |
| **Mean Arterial Pressure** | | | | | | | | | |
|  | <92 mmHg | 1.05 (1.26) | 1.39 (1.26) | 7.71 (7.15) | 10.5 (9.34) |  | 11.3 (6.13) | 15.3 (5.71) | 73.5 (10.2) |
|  | ≥92 mmHg | 1.19 (1.53) | 1.56 (1.49) | 8.65 (9.68) | 11.7 (12.3) |  | 11.1 (6.44) | 14.8 (5.27) | 74.4 (9.82) |
| All values shown are median (IQR) of the arsenic concentrations or percentages for each group.  Age and water consumption levels were divided into tertiles. BMI, systolic blood pressure, diastolic blood pressure, pulse pressure, and mean arterial pressure were divided based on clinically relevant thresholds (72-74). | | | | | | | | | |

| **Supplementary Table 2.** Linear Regression Results with Addition of Alcohol Consumption as a Covariate in Conventional Models. All values in mmHg. | | | | | | | | | | |
| --- | --- | --- | --- | --- | --- | --- | --- | --- | --- | --- |
| Model | Arsenic  Component | Range | Systolic Blood Pressure | | Diastolic Blood Pressure | | Pulse Pressure | | Mean Arterial Pressure | |
| Coefficient | 95% Confidence  Interval | Coefficient | 95%  Confidence  Interval | Coefficient | 95% Confidence  Interval | Coefficient | 95%  Confidence  Interval |
| 1 | InAs | <9.12% (ref) |  |  |  |  |  |  |  |  |
| 9.12%-13.13% | -0.47 | (-3.69, 2.76) | 0.56 | (-1.97, 3.09) | -1.02 | (-3.66, 1.62) | 0.22 | (-2.27, 2.70) |
| >13.13% | -1.22 | (-4.49, 2.06) | -0.50 | (-3.07, 2.07) | -0.72 | (-3.40, 1.97) | -0.74 | (-3.26, 1.79) |
| P for Trend | 0.47 | | 0.70 | | 0.60 | | 0.57 | |
| MMA | <12.39% (ref) |  |  |  |  |  |  |  |  |
| 12.39%-16.07% | 0.62 | (-2.65, 3.89) | 0.25 | (-2.34, 2.83) | 0.38 | (-2.30, 3.05) | 0.37 | (-2.17, 2.91) |
| >16.07% | -3.13 | (-6.44, 0.18) | -0.42 | (-3.04, 2.20) | -2.71 | (-5.42, -0.004) | -1.32 | (-3.89, 1.24) |
| P for Trend | 0.06 | | 0.75 | | 0.05 | | 0.31 | |
| DMA | <71.28% (ref) |  |  |  |  |  |  |  |  |
| 71.28%-77.51% | 4.07 | (1.07, 7.07) | 1.01 | (-1.37, 3.38) | 3.06 | (0.60, 5.53) | 2.03 | (-0.30, 4.36) |
| >77.51% | 3.30 | (0.08, 6.53) | 1.04 | (-1.51, 3.59) | 2.26 | (-0.38, 4.91) | 1.79 | (-0.71, 4.29) |
| P for Trend | 0.046 | | 0.43 | | 0.09 | | 0.16 | |
| 2 | InAs | <9.12% (ref) |  |  |  |  |  |  |  |  |
| 9.12%-13.13% | -0.46 | (-3.65, 2.74) | 0.63 | (-1.85, 3.11) | -1.09 | (-3.74, 1.56) | 0.27 | (-2.17, 2.71) |
| >13.13% | -1.24 | (-4.49, 2.02) | -0.30 | (-2.82, 2.23) | -0.94 | (-3.65, 1.76) | -0.61 | (-3.09, 1.88) |
| P for Trend | 0.46 | | 0.82 | | 0.49 | | 0.63 | |
| MMA | <12.39% (ref) |  |  |  |  |  |  |  |  |
| 12.39%-16.07% | 0.58 | (-2.67, 3.83) | 0.10 | (-2.45, 2.65) | 0.48 | (-2.21, 3.18) | 0.26 | (-2.24, 2.76) |
| >16.07% | -3.22 | (-6.51, 0.07) | -0.41 | (-2.99, 2.17) | -2.81 | (-5.53, -0.08) | -1.35 | (-3.88, 1.18) |
| P for Trend | 0.06 | | 0.76 | | 0.04 | | 0.30 | |
| DMA | <71.28% (ref) |  |  |  |  |  |  |  |  |
| 71.28%-77.51% | 4.23 | (1.24, 7.23) | 0.94 | (-1.42, 3.29) | 3.30 | (0.81, 5.79) | 2.04 | (-0.27, 4.34) |
| >77.51% | 3.31 | (0.12, 6.50) | 0.94 | (-1.57, 3.44) | 2.37 | (-0.28, 5.02) | 1.73 | (-0.72, 4.18) |
| P for Trend | 0.04 | | 0.46 | | 0.08 | | 0.17 | |
| Model 1: Models correct for age, BMI, and worksite.  Model 2: All correct for the same covariates as Model 1, and add hydration, smoke, alcohol use, and work with agrochemicals. | | | | | | | | | | |

| **Supplementary Table 3**. Linear Regression Modeling eGFR as an Effect Modifier in Relationship Between Biomarkers of Arsenic Metabolism and Blood Pressure Metrics. All values in mmHg. | | | | | | | | | | | | | | |
| --- | --- | --- | --- | --- | --- | --- | --- | --- | --- | --- | --- | --- | --- | --- |
| Model | Arsenic  Component | Value1 | Systolic Blood Pressure | | | Diastolic Blood Pressure | | | Pulse Pressure | | | Mean Arterial Pressure | | |
| Coefficient | 95%  Confidence  Interval | p-value | Coefficient | 95%  Confidence  Interval | p-value | Coefficient | 95%  Confidence  Interval | p-value | Coefficient | 95%  Confidence  Interval | p-value |
| 1 | InAs | Reference |  |  |  |  |  |  |  |  |  |  |  |  |
| As*eGFR | 2.74 | (-1.72, 7.20) | 0.23 | 2.63 | (-0.80, 6.07) | 0.13 | 0.11 | (-3.59, 3.81) | 0.95 | 2.67 | (-0.71, 6.05) | 0.12 |
| MMA | Reference |  |  |  |  |  |  |  |  |  |  |  |  |
| As*eGFR | 1.67 | (-2.68, 6.03) | 0.45 | 0.76 | (-2.62, 4.14) | 0.66 | 0.91 | (-2.72, 4.53) | 0.62 | 1.07 | (-2.25, 4.38) | 0.53 |
| DMA | Reference |  |  |  |  |  |  |  |  |  |  |  |  |
| As*eGFR | -2.13 | (-6.33, 2.07) | 0.32 | -2.26 | (-5.51, 0.99) | 0.17 | 0.13 | (-3.36, 3.62) | 0.94 | -2.22 | (-5.41, 0.98) | 0.18 |
| 2 | InAs | Reference |  |  |  |  |  |  |  |  |  |  |  |  |
| As*eGFR | 2.57 | (-1.89, 7.03) | 0.26 | 2.37 | (-1.02, 5.76) | 0.17 | 0.20 | (-3.51, 3.92) | 0.92 | 2.44 | (-0.91, 5.79) | 0.16 |
| MMA | Reference |  |  |  |  |  |  |  |  |  |  |  |  |
| As*eGFR | 1.41 | (-2.95, 5.78) | 0.53 | 0.35 | (-2.99, 3.69) | 0.84 | 1.06 | (-2.58, 4.71) | 0.57 | 0.71 | (-2.59, 4.00) | 0.68 |
| DMA | Reference |  |  |  |  |  |  |  |  |  |  |  |  |
| As*eGFR | -1.93 | (-6.14, 2.28) | 0.37 | -1.94 | (-5.15, 1.27) | 0.24 | 0.01 | (-3.50, 3.52) | 0.99 | -1.94 | (-5.11, 1.23) | 0.23 |
| All models evaluate the statistical interaction between arsenic exposure and eGFR.  1As*eGFR represents the cross-product term between tertiles of arsenic exposure for the percentage of each arsenic metabolite, with the first tertile being the reference. and a binary eGFR variable representing having an eGFR above 90 mL/min/1.73 m2 (with the reference being having an eGFR below 90 mL/min/1.73 m2).  Model 1: Models correct for age and BMI.  Model 2: All correct for the same covariates as Model 1, and add worksite, hydration, smoking status, and work with agrochemicals. | | | | | | | | | | | | | | |
